# Supplementary material for: Human cardiac fibroblasts adaptive responses to controlled combined mechanical strain and oxygen changes in vitro
Source: eLife. 2017 Mar 18;6:e22847. doi: 10.7554/eLife.22847 (PMC5407858; doi:10.7554/eLife.22847)
Supplement: Figure 1—source data 1. — DOI: http://dx.doi.org/10.7554/eLife.22847.004 [file elife-22847-fig1-data1.xlsx]

## Sheet: Sheet1
	Figure 1 Panel B			[AU]
	PX_0	PX_2	PX_8	HX_0	HX_2	HX_8	NX
	26.1269	28.5319	31.9755	34.4957	34.3203	40.3834	19.8425
	25.339	28.3363	36.4693	39.4057	36.9397	38.8937	20.0354
	24.8205	26.0406	31.2408	33.6282	38.5295	36.1746	15.2257
	22.7116	28.1856	36.3708	34.057	33.9866	36.2784	19.4493
	Figure 1 Panel C			[pg/ml]
	PX_0	PX_2	PX_8	HX_0	HX_2	HX_8
	978.87	1028.74	1037.89	618.38	1824.56	1280.17
	952.02	787.76	641.76	771.07	2027.96	1290.01
	800.36	956.48	996.91	733.93	2074.18	2215
	1612.75	960.95	974.38	907.82	2097.42	1533.7
	881.63	821.5	864.31	1051.67	1819.01	1270.35
	956.48	729.84	641.76	766.91	1880.3	1116.76
	733.93	1015.06	779.4	657.5	1902.77	2027.96
	1290.01	925.42	890.33	787.76	1930.98	1231.34
	Figure 1 Panel C			[pg/ml]
	PX_0	PX_2	PX_8	HX_0	HX_2	HX_8
	4.35	0.6	1.52	1.84	10.08	5.22
	5.57	0.05	0.05	0.75	8.07	1.68
	1.84	0.6	1.21	0.6	9.53	6.28
	1.84	1.52	0.31	3.16	8.62	5.22
	2.5	0.05	0.9	2.99	6.46	6.63
	3.67	1.21	0.05	0.9	7.71	0.05
	1.84	0.05	0.18	1.52	7.71	8.07
	14.01	0.75	0.05	1.68	8.43	5.22
	Figure 1 Supplement 1			[AU]
	PX_0	PX_2	PX_8	HX_0	HX_2	HX_8
	26.1269	23.273	26.917	34.6917	31.0642	34.4536
	27.6455	20.5017	25.515	29.8328	37.1361	39.7993
	27.6653	20.9878	27.9248	30.4466	27.3616	44.7572
	22.7116	22.3697	28.3261	29.8546	30.5158	37.3462
