# Supplementary material for: Human cardiac fibroblasts adaptive responses to controlled combined mechanical strain and oxygen changes in vitro
Source: eLife. 2017 Mar 18;6:e22847. doi: 10.7554/eLife.22847 (PMC5407858; doi:10.7554/eLife.22847)
Supplement: Figure 2—source data 1. — DOI: http://dx.doi.org/10.7554/eLife.22847.007 [file elife-22847-fig2-data1.xlsx]

## Sheet: Sheet1
		Figure 2 Panel B			[%]
		PX_0	PX_2	PX_8	HX_0	HX_2	HX_8	NX
		1.13086	2.35799	0.378788	2.09895	1.2605	2.01005	4.25532
		1.25984	1.35841	0.265604	2.50522	1.16732	2.657	6.94444
		0.948767	2.9985	0.568182	2.0362	2.09424	1.04895	4.70588
		0.858369	1.94595	0.3003	2.977	3.90456	1.1274	5.81395
		0.801603
		1.19492
		1.37825
		1.44666
		1.4157
		1.55325
		1.00587
		0.475221
		Figure 2 Panel D			[%]
		PX_0	PX_2	PX_8	HX_0	HX_2	HX_8	NX
		2.73438	7.7748	2.27273	8.12834	5.02994	2.11433	10.4762
		5.32151	8.71886	2.68931	7.04748	7.65958	4.15225	18.9474
		3.68043	9.44444	5.94315	5.70176	5.82363	4.22721	16.129
		4.00654	9.33333	3.28358	10.2244	7.27612	3.75	17.8947
		Figure 2 Panel E			[pg/ml]
		PX_0	PX_2	PX_8	HX_0	HX_2	HX_8
		8.3	11.2	8.54	12.94	48.62	1.21
		11.9	2.02	1.21	51.86	56.27	1.21
		6.56	17.02	1.21	41.79	48.43	38.41
		19.31	13.07	1.21	76.88	40.36	4.92
		5.51	1.21	2.33	50.71	32.59	2.33
		8.96	1.21	2.33	27.85	43.15	1.21
		1.21	14.27	1.21	37.54	26.89	20.11
		1.21	10.13	1.21	49.18	28.17	2.8
		Figure 2 supplement 1			[%]
		PX_0	PX_2	PX_8	HX_0	HX_2	HX_8
		2.92826	2.1875	2.05423	3.0137	3.0853	2.01465
		3.11284	2.68378	2.05607	3.13779	3.34672	1.54639
		3.54223	2.2449	2.81124	4.65116	4.18301	2.38501
		2.71605	3.9823	1.42857	3.1477	1.92308	1.63265
