# Supplementary material for: Human cardiac fibroblasts adaptive responses to controlled combined mechanical strain and oxygen changes in vitro
Source: eLife. 2017 Mar 18;6:e22847. doi: 10.7554/eLife.22847 (PMC5407858; doi:10.7554/eLife.22847)
Supplement: Figure 3—source data 1. — DOI: http://dx.doi.org/10.7554/eLife.22847.010 [file elife-22847-fig3-data1.xlsx]

## Sheet: Sheet1
		Figure 3 Panel A		[pg/ml]
		PX_0	PX_2	PX_8	HX_0	HX_2	HX_8
		0.52	0.12	0.05	0.12	0.78	0.26
		0.05	0.12	0.05	0.46	1.11	0.26
		0.26	0.05	0.26	0.78	0.91	1.3
		0.65	0.05	0.26	0.26	1.04	1.17
		0.12	0.05	0.05	0.26	0.78	0.39
		0.05	0.05	0.05	0.46	1.11	0.05
		0.05	0.12	0.05	0.78	0.65	0.26
		0.26	0.39	0.12	0.26	0.65	0.52
		Figure 3 Panel B		[pg/ml]
		PX_0	PX_2	PX_8	HX_0	HX_2	HX_8
		0.31	n.d.	0.07	0.15	0.39	0.15
		0.31	n.d.	0.15	0.07	0.39	0.31
		0.03	n.d.	0.15	0.23	0.39	0.55
		0.15	n.d.	0.07	0.23	0.39	0.47
		0.19	n.d.		0.19	0.63	0.15
		0.23	n.d.		0.11	0.39	0.31
		0.11	n.d.		0.23	0.23	0.47
		0.07	n.d.		0.23	0.31	0.31
		Figure 3 Panel C				[pg/ml]
		PX_0	PX_2	PX_8	HX_0	HX_2	HX_8
		0.04	0.01	0.04	0.11	0.11	0.04
		0.04	0.11	0.11	0.01	0.01	0.04
		0.04	0.01	0.04	0.01	0.04	0.01
		0.01	0.04	0.04	0.07	0.04	0.04
		0.01	0.01	0.07	0.01	0.11	0.01
		0.11	0.01	0.04	0.01	0.11	0.11
		0.04	0.04	0.01	0.04	0.04	0.11
		0.01	0.04	0.04	0.01	0.04	0.04
		Figure 3 Panel D				[pg/ml]
		PX_0	PX_2	PX_8	HX_0	HX_2	HX_8
		14172.5	8607.3	11237	8009.05	9726.63	11239
		11691.6	9954.07	8221.45	8338.17	12357.5	11182.5
		9600.21	10058.9	9911.07	9095.23	11890.9	13675.7
		11865.1	10952.1	6037.69	10107.8	13459.9	14658.5
		14367	8160.55	10811.3	11494	9256.34	12212
		11614.8	10970.8	8027.19	10088.2	11763.1	11491.9
		8983.06	10899.9	9242.15	9160.53	12473.2	14140.5
		10888.7	11103.5	5375.76	10065.4	13005.2	13465.2
