# Supplementary material for: Human cardiac fibroblasts adaptive responses to controlled combined mechanical strain and oxygen changes in vitro
Source: eLife. 2017 Mar 18;6:e22847. doi: 10.7554/eLife.22847 (PMC5407858; doi:10.7554/eLife.22847)
Supplement: Figure 5—figure supplement 2—source data 1. — DOI: http://dx.doi.org/10.7554/eLife.22847.018 [file elife-22847-fig5-figsupp2-data1.xlsx]

## Sheet: Sheet1
			Figure 5 supplement 2 Panel D				[O2 %]
			5 ml/min				15 ml/min				50 ml/min
	Chamber ID	1	1.34	1.61	1.24	1.36	1.25	1.35	1.3	1.21	1.05	0.94	1.15	1.01
		2	1.41	1.52	1.47	1.61	1.1	1.24	1.15	1.2	1.08	1.14	1.24	1.12
		3	1.24	1.34	1.51	1.38	1.22	1.14	1.43	1.32	1.11	0.91	1	1.02
		4	1.47	1.68	1.49	1.56	1.28	1.41	1.47	1.26	1.32	1.01	1.09	1.11
